# Supplementary material for: Klotho Levels and Their Relationship with Inflammation and Survival among Alcoholic Patients
Source: MDPI journal article supplement (doi:10.3390/biom12081151), 2022-08-20
Supplement: s1 [file s1]

**Supplementary Materials Table S1: Cytokine, MDA, Klotho, cirrhosis and survival data.**

|    | Klotho<br>(pg/mL) | MDA*<br>( $\mu$ mol/L) | TNF- $\alpha$ **<br>(pg/mL) | IL-6***<br>(pg/mL) | IL-8****<br>(pg/mL) | Cirrhosis<br>(n=79) | Survival |
|----|-------------------|------------------------|-----------------------------|--------------------|---------------------|---------------------|----------|
| 1  | 708.60            | 1.29                   | BD                          | 2.96               |                     | NO                  | A        |
| 2  | 777.10            | 2.15                   | BD                          | 10.30              |                     | YES                 | A        |
| 3  | 355.80            | 1.09                   | BD                          | BD                 |                     | NO                  | A        |
| 4  | 523.80            | 2.38                   |                             |                    |                     | NO                  | D        |
| 5  | 624.60            | 1.55                   | BD                          | 6.28               |                     | YES                 | D        |
| 6  | 128.50            | 1.49                   | BD                          | 4.13               | 19.86               | NO                  | D        |
| 7  | 57.60             | 3.47                   | BD                          | 57.79              | 114.49              | YES                 | A        |
| 8  | 342.00            | 5.08                   |                             |                    |                     | NO                  | A        |
| 9  | 521.10            | .38                    | BD                          | 3.76               |                     | NO                  | A        |
| 10 | 454.50            | 1.14                   | BD                          | BD                 |                     | NO                  | A        |
| 11 | 1735.90           | 6.15                   | BD                          | 9.38               | 138.91              | YES                 | A        |
| 12 | 568.20            | .88                    | BD                          | 1.82               |                     | NO                  | A        |
| 13 | 164.10            | 2.77                   |                             |                    |                     | NO                  | A        |
| 14 | 528.50            | 1.82                   | BD                          | 22.80              | 44.33               | YES                 | D        |
| 15 | 133.00            | 1.26                   | 3.86                        | BD                 | 19.86               | NO                  | A        |
| 16 | 427.50            | 4.02                   | BD                          | 16.28              | 56.45               | YES                 | D        |
| 17 | 406.50            | .20                    | BD                          | BD                 |                     | NO                  | D        |
| 18 | 273.10            | 2.93                   | BD                          | BD                 |                     | YES                 | A        |
| 19 | 1354.80           | 6.44                   |                             |                    |                     | YES                 | D        |
| 20 | 772.20            | .98                    | BD                          | BD                 |                     | NO                  | A        |
| 21 | 690.30            | 3.09                   | BD                          | 8.63               | 74.15               | YES                 | D        |
| 22 | 319.00            | 1.23                   | BD                          | 1.58               |                     | NO                  | A        |
| 23 | 236.70            | 2.56                   | 9.89                        | 29.50              | 63.20               | NO                  | D        |
| 24 | 289.59            | 2.93                   | 3.06                        | 19.73              | 23.89               | NO                  | A        |
| 25 | 736.50            | .74                    | BD                          | BD                 |                     | NO                  | D        |
| 26 | 606.00            | 1.47                   |                             |                    |                     | NO                  | A        |
| 27 | 773.40            | 2.62                   | BD                          | 9.84               |                     | YES                 | D        |
| 28 | 351.20            | 1.28                   | 1.82                        | BD                 | 27.63               | NO                  | A        |
| 29 | 521.10            | 1.87                   | BD                          | BD                 |                     | NO                  | D        |
| 30 | 360.50            | 3.51                   |                             |                    |                     | NO                  | D        |
| 31 | 486.20            | 2.53                   | BD                          | 12.49              | 78.84               | YES                 | A        |
| 32 | 643.50            | 2.45                   | BD                          | 9.48               |                     | YES                 | D        |
| 33 | 792.00            | 7.02                   | 7.94                        | 2.15               | 37.00               | YES                 | D        |
| 34 | 636.60            | 5.23                   | 23.70                       | 16.60              | 293.00              | YES                 | D        |
| 35 | 309.80            | .92                    | BD                          | 32.81              | 24.41               | NO                  | A        |
| 36 | 335.40            | 8.09                   |                             |                    |                     | NO                  | A        |
| 37 | 609.10            | 2.16                   |                             |                    |                     | NO                  | A        |
| 38 | 190.65            | 4.91                   | BD                          | 5.58               | 21.84               | NO                  | A        |
| 39 | 1165.50           | .50                    | BD                          | 37.34              |                     | NO                  | D        |
| 40 | 2301.00           | 3.36                   |                             |                    |                     | YES                 | D        |
| 41 | 210.30            | 1.30                   | BD                          | 1.45               | 14.30               | YES                 | A        |
| 42 | 300.60            | 1.76                   | BD                          | 7.55               | 17.00               | NO                  | A        |
| 43 | 439.40            | 1.46                   | 6.18                        | 18.88              | 48.92               | NO                  | A        |
| 44 | 523.80            | 5.59                   | 28.20                       | 43.12              | 29.28               | NO                  | D        |
| 45 | 291.40            | 2.71                   | 20.43                       | 87.97              | 68.06               | NO                  | D        |
| 46 | 368.40            | 3.63                   | 3.46                        | 11.53              | 187.39              | YES                 | A        |
| 47 | 486.20            | 1.88                   | BD                          | 21.98              | 10.17               | NO                  | A        |
| 48 | 355.20            | 3.65                   | BD                          |                    |                     | NO                  | A        |
| 49 | 302.70            | 5.35                   | BD                          |                    |                     | NO                  | A        |
| 50 | 342.00            | 2.26                   | BD                          | 17.53              | 22.86               | YES                 | A        |
| 51 | 1047.90           | 2.90                   | BD                          | 9.84               |                     | YES                 | A        |
| 52 | 144.30            | 3.75                   | BD                          | 28.34              | 19.86               | NO                  | A        |
| 53 | 1185.84           |                        |                             |                    |                     | YES                 | A        |
| 54 | 291.40            | 1.14                   | BD                          | BD                 | 12.59               | YES                 | D        |

|     |         |       |       |        |         |     |   |
|-----|---------|-------|-------|--------|---------|-----|---|
| 55  | 687.00  | 3.32  |       |        |         | NO  | A |
| 56  | 245.80  | 2.02  | 65.72 | 100.84 | 46.93   | NO  | A |
| 57  | 596.40  | 2.61  | BD    | 16.40  | 22.00   | YES | D |
| 58  | 510.00  | 1.28  |       |        |         | NO  | A |
| 59  | 552.10  | 2.36  | BD    | 40.53  | 13.87   | YES | A |
| 60  | 690.30  | 1.96  | BD    | 87.66  | 29.84   | YES | A |
| 61  | 709.50  | 3.55  | 4.65  | 16.91  | 1008.49 | YES | D |
| 62  | 483.00  | 1.24  | BD    | BD     |         | NO  | A |
| 63  | 845.43  | 2.33  |       |        |         | YES | D |
| 64  | 918.66  | 1.09  |       |        |         | YES | D |
| 65  | 623.40  | 4.00  | 6.56  | 7.87   | 11.36   | NO  | A |
| 66  | 460.20  | 1.54  | BD    | BD     | 18.41   | NO  | A |
| 67  | 603.90  | 4.31  | BD    | 31.52  | 175.56  | YES | D |
| 68  | 273.10  | 2.79  | BD    | 71.72  | 32.69   | NO  | A |
| 69  | 223.50  | 17.34 | 1.82  | BD     | 223.48  | YES | D |
| 70  | 464.10  |       | BD    | 43.80  |         | NO  | A |
| 71  | 1471.20 |       | BD    | 39.92  |         | YES | D |
| 72  | 407.70  | 3.67  | BD    | 10.40  | 59.99   | YES | A |
| 73  | 186.60  | 1.57  | 5.76  | 5.12   |         | NO  | A |
| 74  | 66.00   | 2.48  | BD    | 15.90  | 60.71   | NO  | A |
| 75  | 492.60  | .82   | BD    | .99    |         | NO  | D |
| 76  | 825.90  | 5.55  | 12.77 | 60.82  | 280.89  | YES | D |
| 77  | 580.60  | 5.51  | 3.06  | 27.23  | 445.83  | YES | A |
| 78  | 198.90  |       | BD    | 3.98   |         | NO  | A |
| 79  | 381.60  | 3.41  | 16.98 | 1.53   | 17.47   | NO  | D |
| 80  | 828.60  | 1.71  |       |        |         | YES | D |
| 81  | 656.80  | 2.06  | BD    | 15.39  | 62.88   | NO  | A |
| 82  | 279.30  | 2.98  | BD    | .99    |         | YES | A |
| 83  | 547.40  | 1.16  | BD    | BD     | 14.74   | NO  | A |
| 84  | 200.40  | 3.45  | BD    | 5.86   | 15.63   | NO  | D |
| 85  | 342.00  | 5.93  | BD    | BD     | 47.59   | YES | A |
| 86  | 492.60  | 2.94  | BD    | 3.18   |         | YES | A |
| 87  | 741.00  | 1.61  |       |        |         | YES | A |
| 88  | 273.10  | 2.89  | BD    | 8.18   | 28.17   | YES | A |
| 89  | 111.00  | 2.11  | 9.89  | 24.29  | 21.34   | NO  | A |
| 90  | 204.90  | 2.42  | BD    | 81.28  | 23.37   | NO  | A |
| 91  | 289.20  | 1.79  | BD    | 46.28  |         | NO  | A |
| 92  | 315.90  | 4.00  |       |        |         | NO  | A |
| 93  | 365.10  | 1.08  | BD    | BD     | 12.18   | NO  | D |
| 94  | 911.10  |       | BD    | 27.18  |         | YES | D |
| 95  | 1138.50 | .80   | BD    | 20.32  |         | YES | D |
| 96  | 714.90  | 5.59  | 10.26 | 41.67  | 93.53   | YES | D |
| 97  | 652.00  | 2.61  | BD    | BD     | 50.93   | NO  | D |
| 98  | 374.70  | 1.88  |       |        |         | NO  | A |
| 99  | 688.80  | 1.82  |       |        |         | YES | A |
| 100 | 243.60  | 1.26  |       |        |         | YES | A |
| 101 | 358.02  | 1.12  | BD    | 2.26   |         | NO  | A |
| 102 | 397.50  | 3.31  | 8.32  | .99    |         | NO  | A |
| 103 | 346.60  | 1.72  | BD    | 8.33   | 14.30   | NO  | A |
| 104 | 232.10  | 1.06  | 4.25  | 11.67  | 14.74   | NO  | A |
| 105 | 1318.80 | 5.14  | BD    | 11.20  |         | YES | D |
| 106 | 938.73  | 3.95  | BD    | 10.06  |         | YES | A |
| 107 | 459.00  | 2.58  |       |        |         | NO  | A |
| 108 | 773.40  | .84   | BD    | 20.56  |         | YES | D |
| 109 | 1216.80 | 7.74  |       |        |         | NO  | D |
| 110 | 407.70  | 6.79  | 15.94 | 27.79  | 1411.65 | NO  | A |
| 111 | 514.40  | 1.90  | BD    | 4.32   | 17.94   | NO  | D |
| 112 | 623.61  | 1.05  | BD    | 15.90  | 44.97   | YES | D |

|     |         |       |       |        |        |      |   |
|-----|---------|-------|-------|--------|--------|------|---|
| 113 | 63.12   | 1.62  | BD    | 19.37  | 30.97  | NO   | A |
| 114 | 1309.10 | 4.13  | BD    | 27.12  | 24.94  | YES  | A |
| 115 | 84.10   | .94   | BD    | 36.12  | 8.65   | NO   | D |
| 116 | 444.90  | .78   | BD    | BD     | 29.10  | YES  | A |
| 117 | 223.50  | 1.20  |       |        |        | NO   | A |
| 118 | 717.90  | .90   | BD    | BD     |        | NO   | A |
| 119 | 2014.80 | 13.78 | BD    | 24.86  |        | NO   | D |
| 120 | 434.80  | 1.44  | 47.19 | 3.54   | 136.97 | NO   | A |
| 121 | 430.10  | 1.26  | BD    |        | 18.41  | NO   | D |
| 122 | 289.50  | 2.27  | 9.89  | 18.76  | 22.35  | NO   | A |
| 123 | 186.90  | 1.51  | BD    | 2.28   |        | NO   | A |
| 124 | 1202.50 | 5.37  | 30.86 | 20.33  | 39.90  | NO   | A |
| 125 | 66.00   | 1.52  | BD    | 11.81  | 19.37  | YES  | D |
| 126 | 200.40  | 3.39  |       |        |        | NO   | D |
| 127 | 806.10  | 9.80  |       |        |        | YES  | D |
| 128 | 828.60  |       | BD    | 5.58   |        | YES  | D |
| 129 | 894.00  | 2.02  | BD    | 26.67  | 25.47  | YES  | A |
| 130 | 714.90  | 19.90 |       |        |        | YES  | D |
| 131 | 4516.13 | 2.53  | BD    | 10.58  | 7.99   | YES  | D |
| 132 | 682.20  |       | BD    | 14.92  | 100.00 | YES  | A |
| 133 | 216.90  | 1.71  | BD    | BD     | 11.90  | NO   | A |
| 134 | 203.70  | 1.50  | BD    | 4.58   | 8.67   | NO   | D |
| 135 | 1008.00 | 6.28  | BD    | 10.96  | 21.30  | NO   | D |
| 136 | 243.48  | 1.87  | BD    | BD     | 6.48   | NO   | D |
| 137 | 1211.80 | 1.76  | BD    | 8.04   | 16.50  | YES  | D |
| 138 | 963.60  | 1.78  | BD    | BD     | 2.91   | NO   | A |
| 139 | 433.15  | 1.59  | BD    | BD     | 8.08   | NO   | A |
| 140 | 2896.45 | 1.97  |       |        | 3.16   | NO   | A |
| 141 | 585.83  | 5.25  |       |        | 58.90  | NO   | A |
| 142 | 730.10  | 6.30  | BD    | BD     | 73.40  | YES  | A |
| 143 | 1407.66 | 2.65  | BD    | 6.04   | 12.50  | NO   | A |
| 144 | 815.58  | 2.20  | BD    | BD     | 75.90  | YES  | D |
| 145 | 1165.68 |       |       |        |        | YES  | A |
| 146 | 826.68  | 11.48 | BD    | BD     | 100.00 | YES  | A |
| 147 | 1148.39 | 1.31  | BD    | 4.02   | 9.59   | YES  | A |
| 148 | 807.25  | 1.86  | 20.90 | 8.22   | 24.30  | YES  | A |
| 149 | 267.24  | 18.05 | BD    | 129.34 | 48.10  | NO   | A |
| 150 | 708.21  | 2.36  | 74.58 | 6.22   | 80.60  | NO   | A |
| 151 | 372.25  | 2.44  | BD    | 28.04  | 13.60  | NO   | A |
| 152 | 952.32  | 2.33  | BD    | 2.36   | 8.28   | NO   | A |
| 153 | 1322.41 | 2.14  | BD    | BD     | BD     | NO   | A |
| 154 | 832.24  | 2.29  | BD    | BD     | 15.00  | YES  | A |
| 155 | 664.48  | 2.81  | BD    | BD     | 2.46   | NO   | A |
| 156 | 963.60  | 1.69  | 25.26 | 5.32   | 5.84   | NO   | A |
| 157 | 1068.31 | 1.16  | BD    | 6.22   | 8.13   | NO   | A |
| 158 | 955.14  | 1.18  | BD    | 1.80   | 9.25   | NO   | A |
| 159 | 377.53  | 2.53  | BD    | 4.20   | 13.90  | NO   | A |
| 160 | 1619.92 | 2.87  | BD    | 5.86   | 27.40  | NO   | A |
| 161 | 1051.28 | 2.33  | BD    | BD     | 6.92   | NO   | A |
| 162 | 735.58  | 5.18  | BD    | 6.22   | 4.21   | YES  | A |
| 163 | 1797.04 | 19.10 | BD    | 46.16  | 25.50  | NO   | A |
| 164 | 719.16  | 16.74 | BD    | 5.12   | 30.60  | YES  | D |
| 165 | 1275.64 | 9.04  | BD    | 5.46   | 33.20  | YES  | D |
| 166 | 1425.44 | 1.46  | BD    | 1.44   | 12.00  | NO   | A |
| 167 | 1659.00 | 1.95  | 8.06  | 5.32   | 32.70  | YES  | A |
| 168 | 736.50  | 2.78  | BD    | 34.54  |        | YES  | D |
| 169 | 819.60  | .72   | BD    | 3.54   |        | NO   | A |
| 170 | 558.00  | 3.38  | BD    | 9.02   |        | 1.00 | A |

|     |         |       |       |       |  |     |   |
|-----|---------|-------|-------|-------|--|-----|---|
| 171 | 671.40  | 1.18  | 6.60  | 2.28  |  | NO  | D |
| 172 | 502.20  | 1.18  | 11.02 | 4.22  |  | NO  | A |
| 173 | 2139.30 | 1.73  | BD    | 6.16  |  | NO  | A |
| 174 | 1120.50 |       | 40.84 | 14.10 |  | YES | D |
| 175 | 1192.80 |       |       |       |  | YES | A |
| 176 | 4899.90 | 2.03  | BD    | 6.28  |  | YES | A |
| 177 | 1890.60 | 18.54 | BD    | 10.86 |  | NO  | A |
| 178 | 530.40  | 6.47  | BD    | 21.50 |  | YES | D |
| 179 | 1336.80 |       | BD    | 9.84  |  | NO  | A |
| 180 | 549.60  |       | BD    | 4.10  |  | YES | D |
| 181 | 1587.60 |       | BD    | 13.52 |  | NO  | D |
| 182 | 1630.20 | 1.17  |       |       |  | YES | D |
| 183 | 1437.50 | 4.58  | BD    | 3.64  |  | YES | A |
| 184 | 164.40  | 8.85  |       | 10.64 |  | YES | D |

BD: below detection level. A: Alive. D: died. \*n=171; \*\*n=152; \*\*\*n=150; \*\*\*\*n=101.
